# Supplementary material
Source: MDPI journal article supplement (https://www.mdpi.com/1999-4907/14/3/440)
Supplement: s1 [file s1 › forests-2241626-supplementary.pdf]

# Assessment of the Combined Charring and Coating Treatments as a Wood Surface Protection Technique – Supplemental Material

Authors: Jure Žigon and Matjaž Pavlič

## Supplemental Results to Changes Caused by the Natural Weathering

### 1. Images of Samples

The images of the samples before the exposure to natural weathering and the images of samples taken in each monitoring period are shown in Table S1.

**Table S1.** The images of the samples before the exposure to natural weathering and the images of samples taken in each monitoring period. The length of the scale bars is 50 mm.

| Time of weathering | Spruce wood samples                                                                 |                                                                                     |                                                                                     |                                                                                      |                                                                                       |                                                                                       |
|--------------------|-------------------------------------------------------------------------------------|-------------------------------------------------------------------------------------|-------------------------------------------------------------------------------------|--------------------------------------------------------------------------------------|---------------------------------------------------------------------------------------|---------------------------------------------------------------------------------------|
|                    | S                                                                                   | S+Co                                                                                | Ch+B                                                                                | Ch+B+Co                                                                              | Ch                                                                                    | Ch+Co                                                                                 |
| Before             | 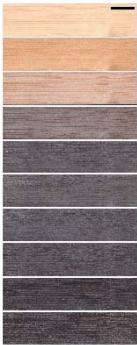  | 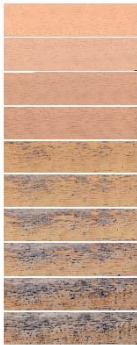  | 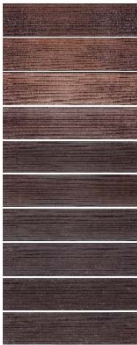  | 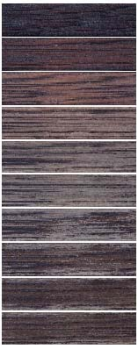  | 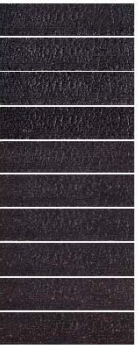  | 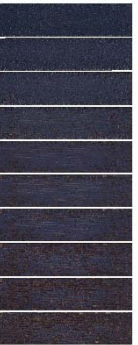  |
| 3 months           | 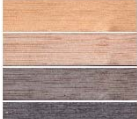   | 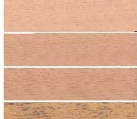   | 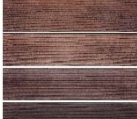   | 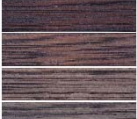   | 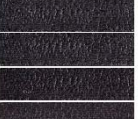   | 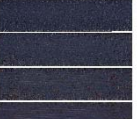   |
| 6 months           | 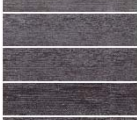  | 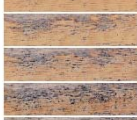  | 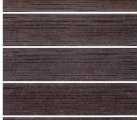  | 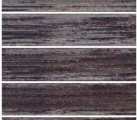  | 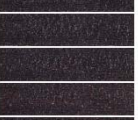  | 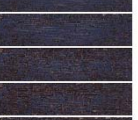  |
| 9 months           | 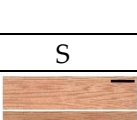 | 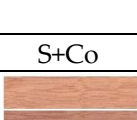 | 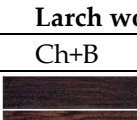 | 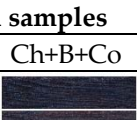 | 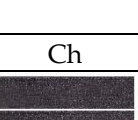 | 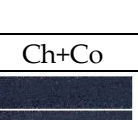 |
| 12 months          | 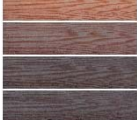 | 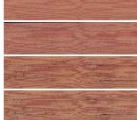 | 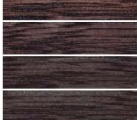 | 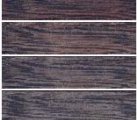 | 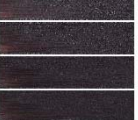 | 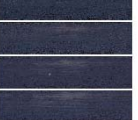 |
| 15 months          | 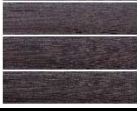 | 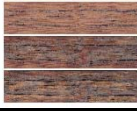 | 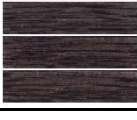 | 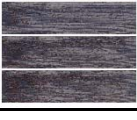 | 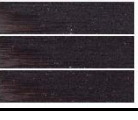 | 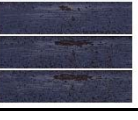 |
| 18 months          | 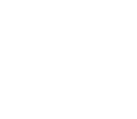 |  |  |  | 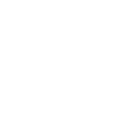 |  |
| 21 months          | 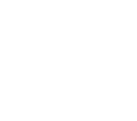 |  |  |  | 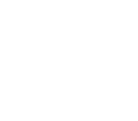 |  |
| 24 months          | 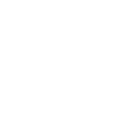 |  |  |  | 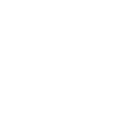 |  |
| Time of weathering | Larch wood samples                                                                  |                                                                                     |                                                                                     |                                                                                      |                                                                                       |                                                                                       |
|                    | S                                                                                   | S+Co                                                                                | Ch+B                                                                                | Ch+B+Co                                                                              | Ch                                                                                    | Ch+Co                                                                                 |
| Before             | 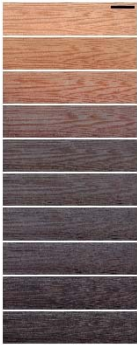 | 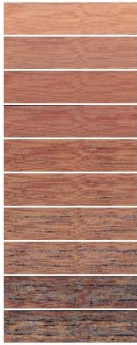 | 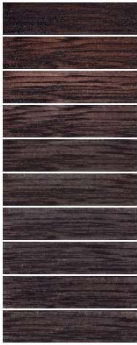 | 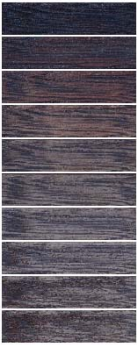 | 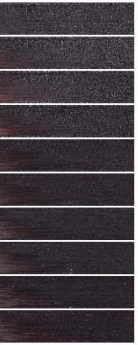 | 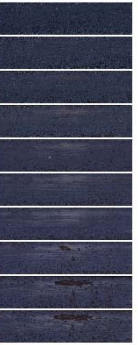 |
| 3 months           |  |  |  |  |  |  |
| 6 months           |  |  |  |  |  |  |
| 9 months           |  |  |  |  |  |  |
| 12 months          |  |  |  |  |  |  |
| 15 months          | 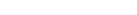 |  |  |  | 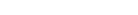 |  |
| 18 months          |  |  |  |  |  |  |
| 21 months          |  |  |  |  |  |  |
| 24 months          |  |  |  |  |  |  |

## 2. Observations Detected in Visual Assessment of Samples by the Period of Monitoring

### 2.1. Cracking

Cracking was evaluated according to the SIST ISO 4628-4 [38] standard. The results are presented in Table S2. The assessment consisted of the following three parts:

- I. The first assessment defines the extent of cracking:
  - 0 – none,
  - 1 – less than a few,
  - 2 – a few,
  - 3 – medium,
  - 4 – medium dense and
  - 5 – dense.
- II. The second assessment defines the size of cracking:
  - 1 – visible only at 10× magnification,
  - 2 – barely visible to the naked eye,
  - 3 – distinctly visible to the naked eye,
  - 4 – large cracks up to 1 mm wide and
  - 5 – very large cracks over 1 mm wide.
- III. The third assessment defines the depth of cracking:
  - a – superficial cracks, the top layer is not completely cracked,
  - b – the top layer is completely cracked, the bottom layer mostly undamaged, or
  - c – the entire coating system is cracked.

**Table S2.** The results of visual assessment of cracking by month of inspection.

| Wood type | Surface treatment | Cracking by month |       |       |       |       |       |       |       |       |
|-----------|-------------------|-------------------|-------|-------|-------|-------|-------|-------|-------|-------|
|           |                   | 1                 | 3     | 6     | 9     | 12    | 15    | 18    | 21    | 24    |
| Spruce    | S+Co              | 0-0-0             | 0-0-0 | 1-2-b | 2-3-c | 2-3-c | 3-3-c | 3-4-c | 3-4-c | 3-4-c |
|           | Ch+B+Co           | 0-0-0             | 0-0-0 | 1-2-b | 2-3-c | 3-3-c | 5-5-c | 5-5-c | 5-5-c | 5-5-c |
|           | Ch+Co             | 5-4-c             | 5-4-c | 5-4-c | 5-4-c | 5-5-c | 5-5-c | 5-5-c | 5-5-c | 5-5-c |
| Larch     | S+Co              | 0-0-0             | 0-0-0 | 1-1-a | 3-3-c | 3-3-c | 4-4-c | 4-4-c | 5-5-c | 5-5-c |
|           | Ch+B+Co           | 0-0-0             | 0-0-0 | 0-0-0 | 2-2-b | 2-2-b | 2-2-b | 3-3-c | 3-3-c | 3-3-c |
|           | Ch+Co             | 5-4-c             | 5-4-c | 5-4-c | 5-4-c | 5-4-c | 5-4-c | 5-5-c | 5-5-c | 5-5-c |

## 2.2. Flaking

Flaking was evaluated according to the SIST ISO 4628-5 [39] standard. The results are presented in Table S3. The assessment consisted of the following three parts:

- I. The first assessment defines the total size of the flaked surface:
  - 0 – no flaking,
  - 1 – flaked at least 0.1% of the surface,
  - 2 – flaked from 0.3% to 1% of the surface,
  - 3 – flaked from 1% to 3% of the surface,
  - 4 – flaked from 3% to 15% of the surface and
  - 5 – flaked at least 15% of the surface.
- II. The second assessment defines the average length of flaked surface:
  - 1 – up to 1 mm,
  - 2 – up to 3 mm,
  - 3 – up to 10 mm,
  - 4 – up to 30 mm and
  - 5 – above 30 mm.
- III. The third assessment defines the place of flaking:
  - a – the top layer flakes from the bottom layer, or
  - b – the entire coating system flakes from the substrate.

**Table S3.** The results of visual assessment of flaking by month of inspection.

| Wood type | Surface treatment | Flaking by month |       |       |       |       |       |       |       |       |
|-----------|-------------------|------------------|-------|-------|-------|-------|-------|-------|-------|-------|
|           |                   | 1                | 3     | 6     | 9     | 12    | 15    | 18    | 21    | 24    |
| Spruce    | S+Co              | 0-0-0            | 0-0-0 | 0-0-0 | 1-1-b | 3-2-b | 5-3-b | 5-3-b | 5-4-b | 5-4-b |
|           | Ch+B+Co           | 0-0-0            | 0-0-0 | 0-0-0 | 2-3-b | 2-3-b | 4-4-b | 5-5-b | 5-5-b | 5-5-b |
|           | Ch+Co             | 1-2-b            | 2-3-b | 3-3-b | 3-3-b | 4-4-b | 4-4-b | 5-5-b | 5-5-b | 5-5-b |
| Larch     | S+Co              | 0-0-0            | 0-0-0 | 0-0-0 | 0-0-1 | 2-2-b | 3-3-b | 4-4-b | 5-5-b | 5-5-b |
|           | Ch+B+Co           | 0-0-0            | 0-0-0 | 0-0-0 | 2-2-b | 2-2-b | 2-2-b | 4-3-b | 4-3-b | 4-3-b |
|           | Ch+Co             | 0-0-0            | 0-0-0 | 2-2-b | 2-2-b | 3-2-b | 3-2-b | 4-3-b | 5-3-b | 5-3-b |

### 2.3. Disfigurements Caused by Fungal or Algal Growth

The intensity of disfigurements was evaluated according to the SIST EN 16492 [40] standard. The results are presented in Table S4. According to the standard, for moulding any staining of the biological origin of the film and/or the substrate was considered, while the cause of the staining (whether it is mould, blue-stain fungi or something else) was not considered. The assessment was visually evaluated with the following grades:

- 0 – unchanged, i.e. no visible growth,
- 1 – very slight, i.e. just visible growth,
- 2 – slight, i.e. clearly visible growth,
- 3 – moderate, i.e. very clearly visible growth,
- 4 – considerable, i.e. pronounced visible growth and
- 5 – very marked visible growth.

**Table S4.** The results of visual assessment of disfigurements caused by fungal or algal growth by month of inspection.

| Wood type | Surface treatment | Disfigurement by microorganisms by month |   |   |   |    |    |    |    |    |
|-----------|-------------------|------------------------------------------|---|---|---|----|----|----|----|----|
|           |                   | 1                                        | 3 | 6 | 9 | 12 | 15 | 18 | 21 | 24 |
| Spruce    | S+Co              | 0                                        | 0 | 1 | 2 | 3  | 4  | 4  | 4  | 4  |
|           | Ch+B+Co           | 0                                        | 0 | 0 | 0 | 0  | 0  | 0  | 0  | 0  |
|           | Ch+Co             | 0                                        | 0 | 0 | 0 | 0  | 0  | 0  | 0  | 0  |
| Larch     | S+Co              | 0                                        | 0 | 0 | 1 | 2  | 3  | 4  | 5  | 5  |
|           | Ch+B+Co           | 0                                        | 0 | 0 | 0 | 0  | 0  | 0  | 0  | 0  |
|           | Ch+Co             | 0                                        | 0 | 0 | 0 | 0  | 0  | 0  | 0  | 0  |

### References

38. *SIST ISO 4628-4; Paints and varnishes—Evaluation of Degradation of Coatings—Designation of Quantity and Size of Defects, And of Intensity of Uniform Changes in Appearance—Part 4: Assessment of Degree of Cracking.* International Organization for Standardization, Geneva, Switzerland; 2016.
39. *SIST ISO 4628-5; Paints and Varnishes—Evaluation of Degradation of Coatings—Designation of Quantity and Size of Defects, and of Intensity of Uniform Changes in Appearance—Part 5: Assessment of Degree of Flaking.* International Organization for Standardization, Geneva, Switzerland; 2016.
40. *SIST EN ISO 16492; Paints and Varnishes—Evaluation of the Surface Disfigurement Caused by Fungi and Algae on Coatings.* European Committee for Standardization, Brussels, Belgium; 2014.
